# Supplementary material for: The first reptilian allergen and major allergen for fish‐allergic patients: Crocodile β‐parvalbumin
Source: PubMed Central journal article supplement — Pediatr Allergy Immunol. 2022 May 13;33(5):e13781. doi: 10.1111/pai.13781 (PMC9320800; doi:10.1111/pai.13781), 2022-05-13
Supplement: PAI-33-0-s001.pdf [file PAI-33-0-s001.pdf]

**TABLE S1** Clinical characteristics of 77 fish-allergic pediatric patients recruited for this study.

| Patients<br># | Sex | Age<br>(yrs) | sIgE (kU/L) |        |              | Skin prick test results (mm) |        |         |           | Implicated fish‡                           | Symptoms        |
|---------------|-----|--------------|-------------|--------|--------------|------------------------------|--------|---------|-----------|--------------------------------------------|-----------------|
|               |     |              | Tuna        | Salmon | Parvalbumin† | Tuna                         | Salmon | Seabass | Crocodile |                                            |                 |
| 1             | M   | 14           | 1.53        | 3.96   | γ            | 0.0                          | 0.0    | 13.0    | 5         | Snapper                                    | AE, OAS         |
| 2             | M   | 5            | -           | -      | γ            | 5.0                          | 8.5    | 15.0    | -         | Salmon, sardine                            | AN, U           |
| 3             | M   | 9            | -           | -      | γ            | 0.0                          | 6.5    | 15.0    | -         | White bait                                 | AE, C, U        |
| 4             | M   | 1            | -           | -      | γ            | 3.0                          | 6.0    | 24.5    | -         | Asian seabass, salmon, white fish          | AE, OAS, U      |
| 5             | M   | 5            | -           | -      | γ            | 4.5                          | 4.5    | 10.0    | -         | Murray cod                                 | AN, GIS, RD     |
| 6             | F   | 13           | -           | -      | n            | 4.5                          | 0.0    | 12.0    | -         | Asian seabass, catfish                     | GIS, RD, U      |
| 7             | F   | 10           | -           | -      | n            | 0.0                          | 0.0    | 3.0     | -         | Salmon, white fish                         | AE, GIS, U      |
| 8             | M   | 11           | 4.83        | 25.30  | γ            | 4.0                          | 12.0   | 11.5    | -         | Tuna, white fish                           | AE, GIS, OAS, U |
| 9             | F   | 5            | -           | -      | γ            | 0.0                          | 5.5    | 7.0     | -         | Salmon                                     | GIS, U          |
| 10            | M   | 9            | -           | -      | n            | 2.0                          | 7.5    | 5.0     | -         | Salmon                                     | U               |
| 11            | F   | 7            | -           | -      | γ            | 6.5                          | 9.0    | 16.0    | 5.5       | Salmon, tilapia, tuna, yellowtail kingfish | AE, OAS, U      |
| 12            | M   | 10           | -           | -      | n            | 3.0                          | 4.0    | 8.0     | -         | White bait                                 | AN, RD, U       |
| 13            | M   | 10           | 0.01        | <0.01  | n            | 2.5                          | 0.0    | 3.5     | -         | Asian seabass                              | OAS, U          |
| 14            | M   | 7            | 0.10        | 0.64   | n            | 0.0                          | 5.0    | 18.5    | -         | White fish                                 | OAS, U          |
| 15            | M   | 13           | 1.99        | 1.24   | γ            | 2.5                          | 4.5    | 21.0    | -         | White fish                                 | OAS, U          |
| 16            | M   | 14           | 0.28        | 0.21   | n            | 2.5                          | 0.0    | 10.5    | -         | Salmon                                     | AE              |
| 17            | M   | 3            | 0.03        | 0.03   | n            | 4.0                          | 0.0    | 5.0     | -         | Catfish                                    | AE, U           |
| 18            | F   | 12           | 1.41        | 3.43   | γ            | 4.0                          | 11.0   | 19.0    | -         | White fish                                 | OAS, U          |
| 19            | F   | 13           | 0.02        | 0.01   | n            | 2.5                          | 0.0    | 9.5     | -         | Murray cod or tuna                         | U               |
| 20            | M   | 4            | <0.01       | <0.01  | n            | 0.0                          | 0.0    | 3.0     | -         | White fish                                 | U               |
| 21            | F   | 2            | 0.78        | 0.60   | n            | 0.0                          | 3.5    | 0.0     | -         | Salmon                                     | AE, U           |
| 22            | M   | 1            | -           | -      | γ            | 0.0                          | 4.5    | 3.5     | -         | Catfish                                    | AE              |
| 23            | M   | 12           | 5.91        | 9.01   | γ            | 9.0                          | 8.0    | 16.5    | -         | Asian seabass                              | U               |
| 24            | M   | 9            | 2.15        | 5.33   | γ            | 5.5                          | 3.0    | 15.5    | -         | Trevally                                   | AN, RD, U       |
| 25            | M   | 11           | 0.14        | 0.11   | n            | 0.0                          | 0.0    | 3.5     | -         | White fish                                 | AE, AN, RD, U   |
| 26            | F   | 1            | 5.14        | 5.58   | γ            | 0.0                          | 3.0    | 15.5    | 14.5      | Asian seabass                              | AE, RD, U       |
| 27            | M   | 8            | 4.67        | 9.80   | γ            | 4.5                          | 2.0    | 7.0     | -         | Salmon                                     | OAS             |
| 28            | F   | 2            | 31.00       | 73.40  | γ            | 5.5                          | 13.5   | 18.5    | -         | Cod                                        | AE, U           |
| 29            | M   | 8            | 21.00       | 70.50  | γ            | 6.5                          | 12.0   | 19.0    | 18        | White fish                                 | GIS, RD, U      |
| 30            | F   | 6            | -           | -      | γ            | 3.0                          | 4.5    | 19.0    | -         | White fish                                 | AE              |
| 31            | M   | 9            | 0.06        | 0.46   | n            | 2.0                          | 6.5    | 6.5     | -         | Croaker                                    | AE              |
| 32            | F   | 10           | 0.15        | 0.14   | n            | 0.0                          | 0.0    | 17.0    | -         | Catfish                                    | GIS, RD, OAS    |
| 33            | M   | 5            | 6.78        | 11.50  | γ            | 5.0                          | 6.0    | 12.5    | -         | Leather jacket                             | AE              |
| 34            | M   | 7            | 0.70        | 7.63   | γ            | 0.0                          | 6.0    | 7.5     | -         | Trout                                      | AE, OAS, U      |
| 35            | F   | 7            | 1.19        | 3.08   | γ            | 2.5                          | 0.0    | 16.0    | -         | White fish                                 | U               |
| 36            | M   | 4            | 17.30       | 21.00  | γ            | 0.0                          | 7.0    | 10.0    | -         | White fish                                 | AP, U           |
| 37            | M   | 14           | 0.71        | 1.60   | γ            | 1.0                          | 10.5   | 9.5     | -         | Salmon                                     | OAS, U          |
| 38            | M   | 7            | 0.95        | 0.54   | γ            | 2.0                          | 2.0    | 17.5    | -         | Tilapia                                    | C, GIS          |

|    |   |    |       |       |   |     |      |      |      |                                |                 |
|----|---|----|-------|-------|---|-----|------|------|------|--------------------------------|-----------------|
| 39 | F | 4  | 0.71  | 0.47  | n | 0.0 | 0.0  | 17.0 | -    | Catfish                        | AE, E, U        |
| 40 | F | 15 | 0.86  | 1.39  | n | 2.5 | 5.0  | 16.5 | 3.5  | Asian seabass                  | AE, U           |
| 41 | M | 18 | 1.06  | 3.21  | y | 4.0 | 6.5  | 13.0 | -    | Tuna                           | RD, U           |
| 42 | M | 12 | 0.18  | 0.24  | n | 3.0 | 3.0  | 14.0 | -    | Unknown                        | RD, U           |
| 43 | M | 9  | 2.38  | 3.74  | y | 4.0 | 6.5  | 14.0 | -    | Silver perch                   | AE              |
| 44 | F | 2  | -     | -     | y | 4.5 | 7.0  | 17.0 | 12.0 | Salmon, yellowtail kingfish    | U               |
| 45 | F | 12 | 14.90 | 38.90 | y | 3.0 | 4.5  | 14.0 | -    | Flathead                       | AE              |
| 46 | M | 1  | <0.01 | <0.01 | n | 0.0 | 0.0  | 3.5  | -    | Salmon                         | AE, U           |
| 47 | F | 3  | -     | -     | n | 0.0 | 0.0  | 0.0  | -    | Hake                           | AN, U           |
| 48 | F | 11 | 0.02  | 0.04  | y | 5.5 | 0.0  | 4.0  | -    | Silver bream                   | AN, AE, OAS, RD |
| 49 | F | 17 | -     | -     | y | 4.0 | 0.0  | 7.0  | -    | Catfish                        | GIS             |
| 50 | M | 8  | -     | -     | y | 4.5 | 4.5  | 10.0 | -    | Cod, white fish                | AN, R, RD, U    |
| 51 | M | 20 | -     | -     | n | 0.0 | 3.0  | 14.5 | -    | White fish                     | AE, U           |
| 52 | F | 13 | 9.43  | 20.60 | n | 5.0 | 9.5  | 15.5 | -    | Salmon                         | U               |
| 53 | M | 1  | -     | -     | y | 1.0 | 6.0  | 12.0 | -    | Tilapia, yellowtail kingfish   | AE, U           |
| 54 | M | 5  | -     | -     | n | 0.0 | 3.0  | 13.5 | -    | White fish                     | AE, OAS, U      |
| 55 | M | 15 | -     | -     | y | 4.0 | 12.0 | 19.0 | -    | Milkfish                       | U               |
| 56 | M | 10 | -     | -     | y | 0.0 | 4.5  | 14.0 | -    | Perch                          | U               |
| 57 | M | 8  | -     | -     | n | 0.0 | 6.5  | 20.5 | -    | Bream                          | AN, AE, RD      |
| 58 | M | 16 | -     | -     | n | 5.5 | 4.5  | 17.0 | -    | Snapper                        | U               |
| 59 | M | 11 | -     | -     | n | 3.5 | 3.0  | 3.5  | 1.0  | Salmon, white fish             | AE, C, RD       |
| 60 | M | 15 | -     | -     | n | 2.0 | 2.5  | 8.5  | 0.0  | Asian seabass, salmon          | AP, GIS, RD     |
| 61 | M | 18 | -     | -     | y | 0.0 | 4.5  | 5.0  | 2.5  | Catfish, white fish            | GIS             |
| 62 | F | 17 | 3.18  | 2.88  | n | 1.0 | 2.5  | 11.5 | -    | Asian seabass, croaker         | OAS, R          |
| 63 | M | 14 | 1.17  | 8.09  | y | 4.5 | 11.0 | 6.5  | 5.0  | Catfish                        | RD, U           |
| 64 | F | 13 | -     | -     | n | 0.0 | 0.0  | 5.0  | 0.0  | White fish                     | OAS, U          |
| 65 | M | 14 | -     | -     | n | 6.0 | 0.0  | 9.5  | -    | Asian seabass                  | AN              |
| 66 | M | 11 | 39.50 | 66.10 | y | 5.0 | 4.5  | 21.0 | -    | Salmon                         | AE              |
| 67 | M | 15 | 12.10 | 17.60 | y | 5.5 | 8.5  | 20.0 | -    | Ling                           | AE, OAS         |
| 68 | F | 10 | 7.33  | 9.08  | y | 2.0 | 3.5  | 9.0  | -    | White fish                     | AE, OAS, RD     |
| 69 | M | 2  | -     | -     | y | 4.0 | 7.5  | 4.5  | -    | Salmon                         | U               |
| 70 | M | 12 | 3.90  | 31.80 | y | 0.0 | 7.0  | 3.0  | -    | Salmon, tuna                   | E, U            |
| 71 | M | 7  | -     | -     | y | 4.0 | 7.5  | 13.5 | -    | Ling                           | AE, U           |
| 72 | F | 21 | 1.27  | 0.58  | n | 0.0 | 0.0  | 0.0  | -    | Snapper, tuna                  | AE, GIS, U      |
| 73 | F | 17 | -     | -     | n | 3.5 | 0.0  | 0.0  | -    | White fish                     | AE, AN, GIS, RD |
| 74 | M | 18 | -     | -     | n | 3.0 | 6.0  | 9.5  | -    | Salmon, silver perch, shark    | AE, AN, C, RD   |
| 75 | M | 10 | 13.50 | 54.20 | y | 5.5 | 10.5 | 17.5 | -    | Asian seabass, tuna            | AE              |
| 76 | F | 15 | -     | -     | y | 5.5 | 5.0  | 16.5 | -    | Salmon                         | E, U            |
| 77 | F | 13 | -     | -     | n | 0.0 | 4.5  | 16.0 | 3.0  | Milk fish, tilapia, white fish | C, RD, U        |

Note: M, male; F, female; yrs, years; '-', not determined; AE, angioedema (lip/face swelling); AN, anaphylaxis; AP, abdominal pain; C, conjunctivitis; E, eczema; GIS, gastrointestinal syndrome (vomiting); OAS, oral allergy syndrome (itchy mouth or swelling throat/tongue); R, rhinitis (irritation inside nose, sneezing); RD, respiratory distress; U, urticaria (erythema, hives, rash). †IgE-binding to salmon or catfish parvalbumin as determined by immunoblotting in <sup>52</sup>; y, yes; n, no. ‡ Fish species which was associated with clinical reaction upon ingestion.

## SUPPORTING INFORMATION

### METHODS

#### Gel-electrophoresis and immunoblotting analyses

Proteins were separated according to their molecular weights using a Criterion™ SDS-PAGE system (Bio-Rad) or Dual Double Wide Mini Vertical System (C.B.S. Scientific). Crocodile parvalbumin (PV) isoforms were separated by their isoelectric point using ReadyStrip™ IPG Strips (11 cm, pH 3-6) in a PROTEAN IEF cell (Bio-Rad) prior to SDS-PAGE as described previously.<sup>S1</sup> Proteins were visualized by Coomassie Brilliant Blue R-250 staining.

For subsequent immunoblotting, proteins were transferred onto a nitrocellulose membrane and incubated with antibodies or serum as described previously.<sup>S2,3</sup> PV isoforms were detected using the commercial monoclonal PARV-19 antibody raised against frog  $\alpha$ -PV and a polyclonal in-house anti-fish  $\beta$ -PV antibody raised against seabass PV.<sup>S4</sup> Monoclonal mouse anti-human IgE antibody (sc-53346; Santa Cruz) was used for all IgE-immunoblots. The Surf-Blot Antibody Screening System (Idea Scientific) was used to investigate serum IgE-binding from all patients to the same extract, including grid immunoblotting, as described previously.<sup>S1,2,5-9</sup> All immunoblots were developed with a corresponding infra-red-labeled antibody (DyLight anti-mouse/rabbit 4xPEG; ThermoFisher Scientific), followed by visualization using an Odyssey CLx infra-red imaging system (LI-COR®) and densitometric analyses with Image Studio Version 5.2 (LI-COR®), allowing sensitive and semi-quantitative evaluation of signals.

#### Recombinant protein expression

The sequences for crocodile  $\beta$ - and  $\alpha$ -PV (XP\_019397705 and XP\_019400389, respectively, in the NCBI database ([www.ncbi.nlm.nih.gov/protein](http://www.ncbi.nlm.nih.gov/protein))) and thornback ray (*Raja clavata*)  $\alpha$ -PV

(P02630) were optimized for *E. coli* expression and cloned into the pET-28b(+) vector at BamHI and EcoRI restriction sites with cleavable polyhistidine-tag to permit purification of the native protein. Recombinant PVs were expressed in BL-21(DE3) *E. coli* strain,<sup>S10</sup> and purified by immobilized metal affinity chromatography (NiNTA) with Tris-HCl buffer and an imidazole gradient at pH 7.5. Following size-exclusion chromatography, polyhistidine-tags were cleaved with tobacco etch virus (TEV) protease according to a previously established protocol.<sup>S11</sup> Effectiveness of purification and TEV cleavage was verified with SDS-PAGE. Proteins were dialyzed into 50 mM Tris-HCl with 150 mM NaCl buffer (pH 7.5) and stored at -80°C prior to immunological analyses.

### **Mass spectrometry analysis**

Whole crocodile protein extracts, purified parvalbumin and IgE-binding bands were digested with trypsin and analyzed by mass spectrometry as described previously.<sup>S2,12</sup> Results were analyzed using both Mascot (version 2.4) search engine and MaxQuant (version 1.6.10.43) against an NCBI database containing amino acid sequences of all proteins from the corresponding species or closest higher classification with at least three annotated genomes/transcriptomes (May 2021). The protein abundance was expressed in relative intensity-based absolute quantification (iBAQ%) value.<sup>S13</sup> Identified protein groups with at least one unique peptide and a minimum of two razor/unique peptides were included in the analyses.

### **LAD2 cell degranulation assay**

Crocodile  $\beta$ - and  $\alpha$ -PV were evaluated for cellular reactivity using the LAD2 cell line as described previously.<sup>S14,15</sup> Seabass  $\beta$ -PV served as reference and positive control. Briefly,

human mast cells were cultured in complete StemPro™-34 media (ThermoFisher) containing stem cell factor (PeproTech). Cells were incubated overnight with serum from a fish-allergic subject or control individual, recombinant IgE or buffer, and treated with PV or polyclonal anti-IgE (Vector Laboratories) at 37°C for 45 min. To measure degranulation,  $\beta$ -hexosaminidase was quantified by incubation with p-nitrophenyl-N-acetyl- $\beta$ -D-glucosaminide (Glycosynth) followed by addition of glycine.  $\beta$ -hexosaminidase release was expressed as a percentage of total available cellular enzyme, determined by Triton X-100 (0.1%)-induced cell lysis. Spontaneous release of  $\beta$ -hexosaminidase (typically <5%) was subtracted from all values.

### ***In silico* analyses and predictions**

Amino acid sequence alignment was prepared using Jalview and MUSCLE.<sup>S16,17</sup> Sequence identities and similarities were calculated using the Sequence Manipulation Suite.<sup>S18</sup> Linear epitopes with a minimal length of five amino acids were predicted using BcePred, Bepipred, and BepiPred-2.0.<sup>S19–21</sup> Peptides with one mismatch or two mismatches but a higher similarity than identity were considered to be likely recognized by the same IgE antibody, based on Ayuso et al.<sup>S22</sup> A model for crocodile  $\beta$ -PV was generated with Swiss Model (based on the crystal structure of chicken  $\beta$ -PV (PDB code: 3FS7)), and visualized using PyMOL (version 2.0).<sup>S23</sup>

### **EPITOPE PREDICTIONS**

Sequence identity of the investigated PV isoforms was 27-85% with three as well as two IgE-binding regions reported for seabass and salmon PV, respectively (**Table S4**).<sup>S9,24</sup> The highest sequence identity among all PVs was in the seabass PV's IgE-binding region 2. As this could

not explain all observed IgE-binding patterns, 20 linear epitopes for crocodile  $\beta$ -PV were predicted *in silico*. Their sequences were compared with corresponding peptides from above-mentioned PVs, identifying three possible epitopes (residues 59-65 (IEEDELQL), 79-85 (TDAETKA), and 76-81 (RALTDA)), which could explain observed frequent IgE-binding of multiple  $\beta$ -PV but not  $\alpha$ -PV (**Table S5**).

## REFERENCES

- S1. Ruethers T, Raith M, Sharp MF, Koeberl M, Stephen JN, Nugraha R, et al. Characterization of Ras k 1 a novel major allergen in Indian mackerel and identification of parvalbumin as the major fish allergen in 33 Asia-Pacific fish species. *Clin Exp Allergy*. 2018;48:452–63.
- S2. Ruethers T, Taki AC, Karnaneedi S, Nie S, Kalic T, Dai D, et al. Expanding the allergen repertoire of salmon and catfish. *Allergy*. 2021;76:1443–53.
- S3. Ruethers T, Taki AC, Nugraha R, Cao TT, Koeberl M, Kamath SD, et al. Variability of allergens in commercial fish extracts for skin prick testing. *Allergy*. 2019;74:1352–63.
- S4. Sharp MF, Stephen JN, Kraft L, Weiss T, Kamath SD, Lopata AL. Immunological cross-reactivity between four distant parvalbumins-Impact on allergen detection and diagnostics. *Mol Immunol*. 2015;63:437–48.
- S5. Reese G, Schmechel D, Ayuso R, Lehrer SB. Grid-immunoblotting: a fast and simple technique to test multiple allergens with small amounts of antibody for cross-reactivity. *J Chromatogr B Biomed Sci App*. 2001;756:151–6.
- S6. Kamath SD, Johnston EB, Iyer S, Schaeffer PM, Koplin J, Allen K, et al. IgE reactivity to shrimp allergens in infants and their cross-reactivity to house dust mite. *Pediatr Allergy Immunol*. 2017;28:703–7.
- S7. Johnston EB, Kamath SD, Iyer SP, Pratap K, Karnaneedi S, Taki AC, et al. Defining specific allergens for improved component-resolved diagnosis of shrimp allergy in adults. *Mol Immunol*. 2019;112:330–7.
- S8. Kamath SD, Scheiblhofer S, Johnson CM, Machado Y, McLean T, Taki AC, et al. Effect of structural stability on endolysosomal degradation and T-cell reactivity of major shrimp allergen tropomyosin. *Allergy*. 2020;75:2909–19.
- S9. Sharp MF, Taki AC, Ruethers T, Stephen JN, Daly NL, Lopata AL, et al. IgE and IgG4 epitopes revealed on the major fish allergen Lat c 1. *Mol Immunol*. 2021;131:155–63.
- S10. Andersen KR, Leksa NC, Schwartz TU. Optimized *E. coli* expression strain LOBSTR eliminates common contaminants from His-tag purification. *Proteins Struct Funct Bioinforma*. 2013;81:1857–61.

- S11. Booth WT, Schlachter CR, Pote S, Ussin N, Mank NJ, Klapper V, et al. Impact of an N-terminal Polyhistidine Tag on Protein Thermal Stability. *ACS Omega*. 2018;3:760–8.
- S12. Nugraha R, Kamath SD, Johnston E, Zenger KR, Rolland JM, O’Hehir RE, et al. Rapid and comprehensive discovery of unreported shellfish allergens using large-scale transcriptomic and proteomic resources. *J Allergy Clin Immunol*. 2018;141:1501-1504 e8.
- S13. Shin J-B, Krey JF, Hassan A, Metlagel Z, Tauscher AN, Pagana JM, et al. Molecular architecture of the chick vestibular hair bundle. *Nat Neurosci*. 2013;16:365–74.
- S14. Fernandopulle NA, Zhang SS, Soeding PF, Mackay GA. MRGPRX2 activation in mast cells by neuromuscular blocking agents and other agonists: Modulation by sugammadex. *Clin Exp Allergy*. 2020;51:685–95.
- S15. Kirshenbaum AS, Akin C, Wu Y, Rottem M, Goff JP, Beaven MA, et al. Characterization of novel stem cell factor responsive human mast cell lines LAD 1 and 2 established from a patient with mast cell sarcoma/leukemia; activation following aggregation of FcεRI or FcγRI. *Leuk Res*. 2003;27:677–82.
- S16. Waterhouse AM, Procter JB, Martin DMA, Clamp M, Barton GJ. Jalview Version 2--a multiple sequence alignment editor and analysis workbench. *Bioinformatics*. 2009;25:1189–91.
- S17. Edgar RC. MUSCLE: multiple sequence alignment with high accuracy and high throughput. *Nucleic Acids Res*. 2004;32:1792–7.
- S18. Stothard P. The Sequence Manipulation Suite: JavaScript Programs for Analyzing and Formatting Protein and DNA Sequences. *Biotechniques*. 2000;28:2.
- S19. Saha S, Raghava GPS. BcePred: Prediction of Continuous B-Cell Epitopes in Antigenic Sequences Using Physico-chemical Properties. In: Nicosia G, Cutello V, Bentley PJ, Timmis J, editors. *Artificial Immune Systems*. Berlin, Heidelberg: Springer Berlin Heidelberg; 2004. p. 197–204.
- S20. Larsen J, Lund O, Nielsen M. Improved method for predicting linear B-cell epitopes. *Immunome Res*. 2006;2:2.
- S21. Jespersen MC, Peters B, Nielsen M, Marcatili P. BepiPred-2.0: improving sequence-based B-cell epitope prediction using conformational epitopes. *Nucleic Acids Res*. 2017;45:W24–9.
- S22. Ayuso R, Reese G, Leong-Kee S, Plante M, Lehrer SB. Molecular basis of arthropod cross-reactivity: IgE-binding cross-reactive epitopes of shrimp, house dust mite and cockroach tropomyosins. *Int Arch Allergy Immunol*. 2002;129:38–48.
- S23. Waterhouse A, Bertoni M, Bienert S, Studer G, Tauriello G, Gumienny R, et al. SWISS-MODEL: homology modelling of protein structures and complexes. *Nucleic Acids Res*. 2018;46:W296–303.
- S24. Perez-Gordo M, Lin J, Bardina L, Pastor-Vargas C, Cases B, Vivanco F, et al. Epitope mapping of Atlantic salmon major allergen by peptide microarray immunoassay. *Int Arch Allergy Immunol*. 2012;157:31–40.

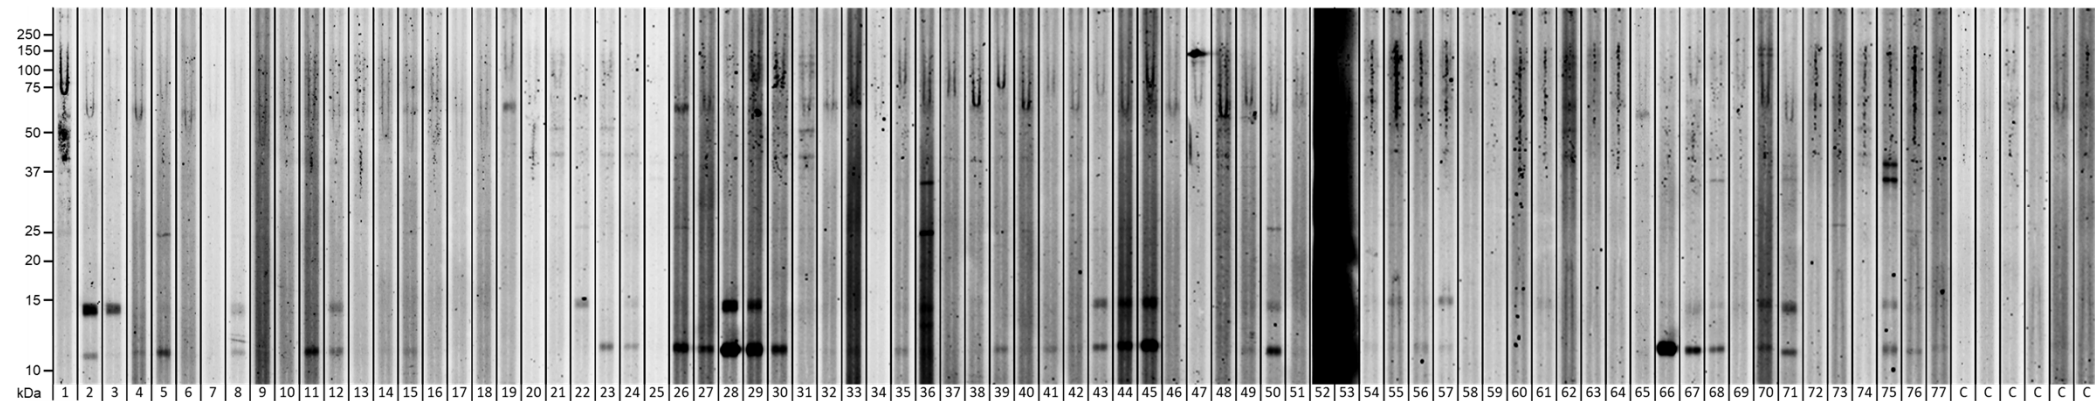

**FIGURE S1** IgE-surfblots with heated crocodile extracts. See Table S1 for patient details and Table S2 for corresponding evaluation by densitometric analyses. Note: C, controls.





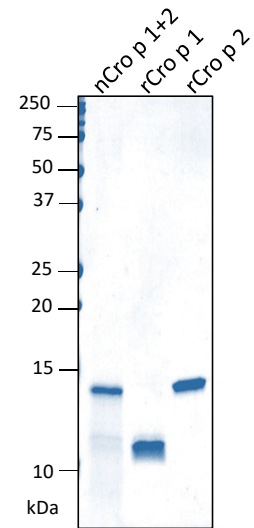

**FIGURE S2** SDS-PAGE protein profiles of purified parvalbumin (PV) from crocodile: Natural purified (nCro p 1+2), recombinant  $\beta$ -PV (rCro p 1) and  $\alpha$ -PV isoform (rCro p 2). Note: Same protein content in each lane.

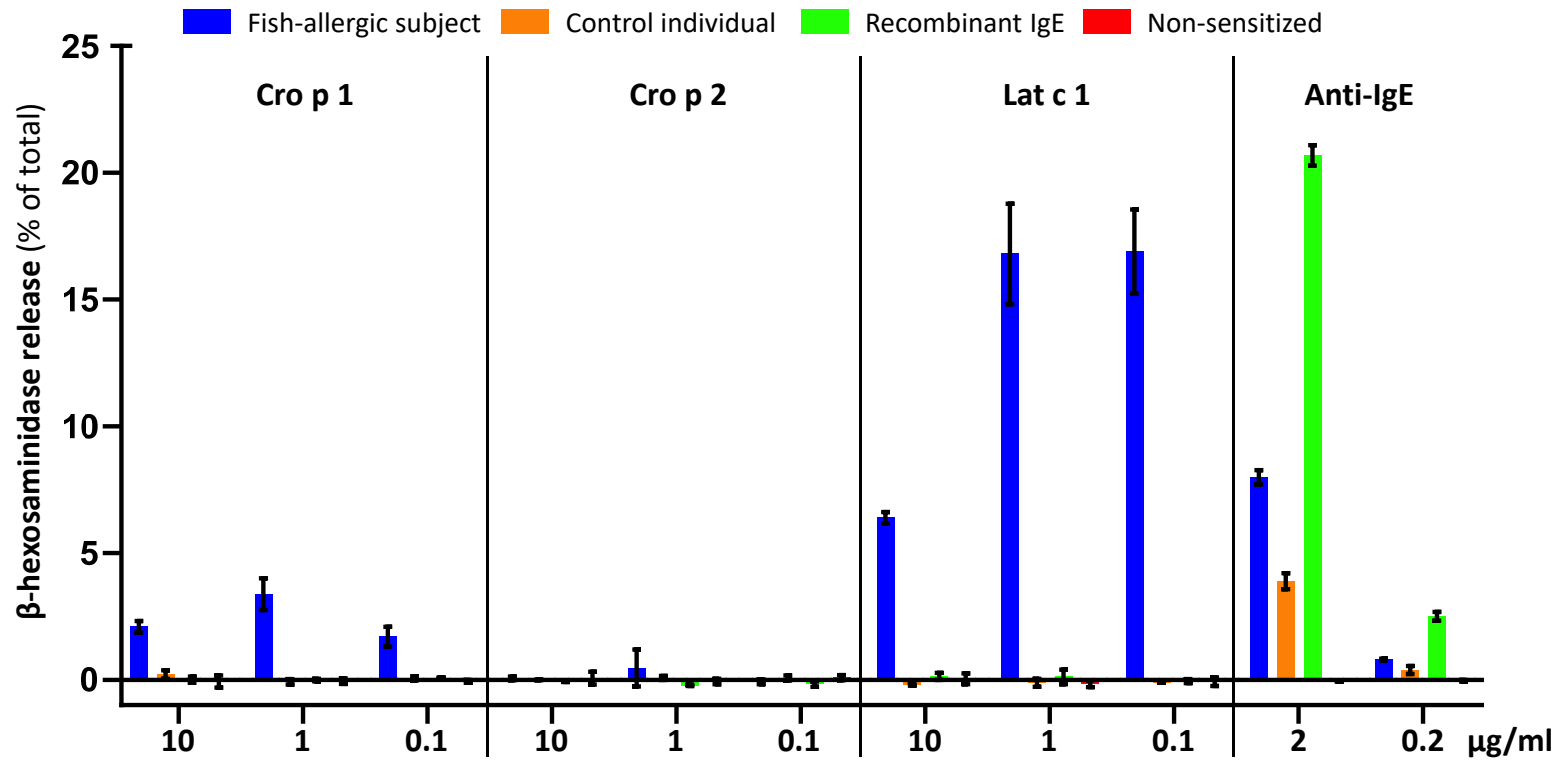

**FIGURE S3** Degranulation activity of crocodile  $\beta$ -parvalbumin (Cro p 1) and  $\alpha$ -parvalbumin (Cro p 2), seabass  $\beta$ -parvalbumin (Lat c 1), and anti-IgE in LAD2 cell assay.

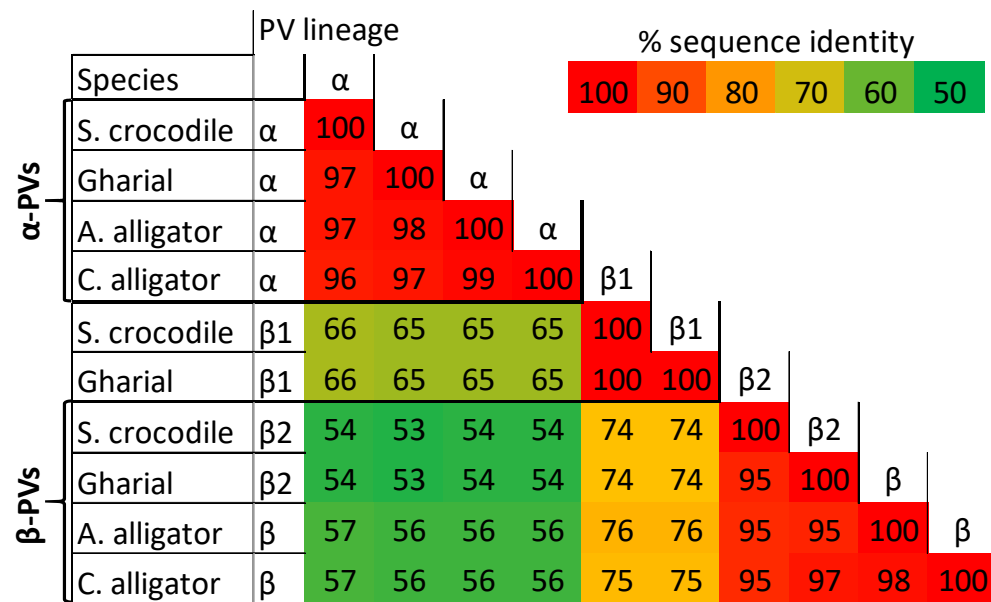

**FIGURE S4** Sequence identity matrix for amino acid sequences from Crocodilian  $\alpha$ - and  $\beta$ -parvalbumin (PV) isoforms available in the NCBI database ([www.ncbi.nlm.nih.gov/protein](http://www.ncbi.nlm.nih.gov/protein)). Note: S., Saltwater; A., American; C., Chinese.

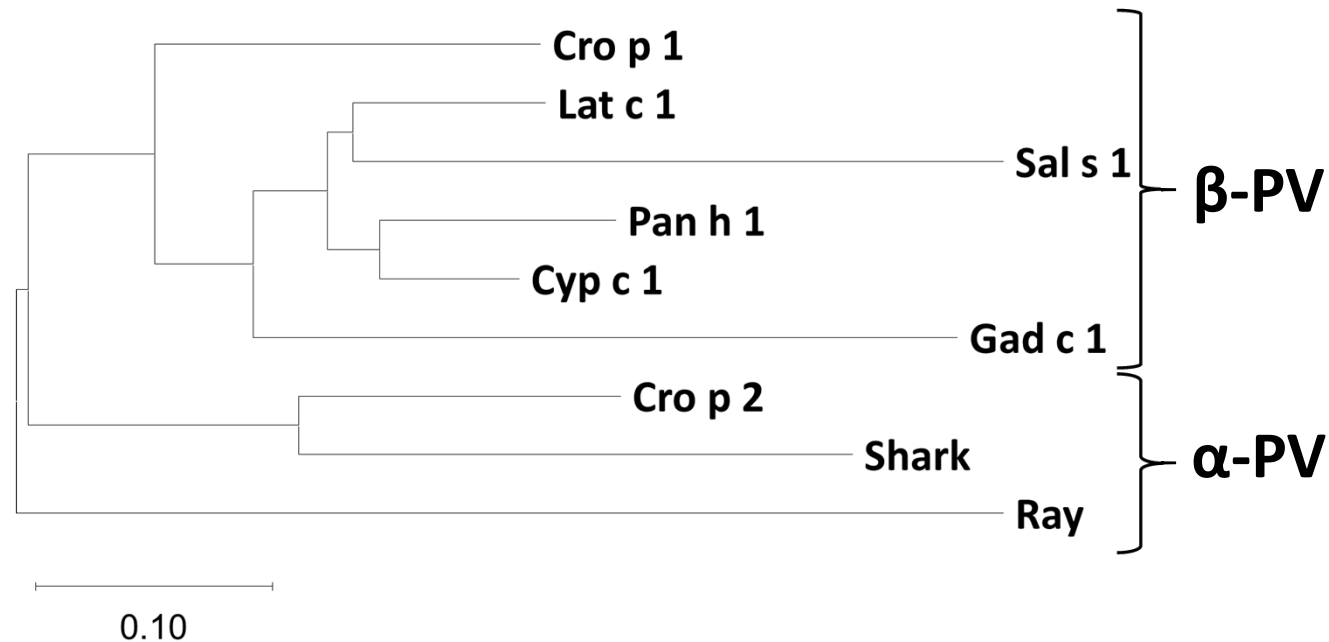

**FIGURE S5** Molecular phylogenetic tree of six  $\beta$ - and three  $\alpha$ -parvalbumin (PV) isoforms, which were investigated in the study. The optimal tree using the Neighbor-Joining method is shown.<sup>1</sup> The tree is drawn to scale, with branch lengths in the same units as those of the evolutionary distances used to infer the phylogenetic tree. The distances were computed using the Poisson correction method and are in the units of the number of amino acid substitutions per site.<sup>2</sup>

<sup>1</sup> Saitou N and Nei M. The neighbor-joining method: A new method for reconstructing phylogenetic trees. *Mol Biol Evol.* 1987;4:406-425.

<sup>2</sup> Zuckerkandl E and Pauling L. Evolutionary divergence and convergence in proteins. In *Evolving Genes and Proteins*. New York: Academic Press; 1965, pp. 97-166.

**TABLE S3** Sequence identity and similarity of crocodile  $\beta$ -parvalbumin (PV, Cro p 1) and  $\alpha$ -PV (Cro p 2) with fish derived  $\beta$ - and  $\alpha$ -PV isoforms. See Figure 5 for the corresponding sequence alignment. Accession I.D. refers to NCBI database ([www.ncbi.nlm.nih.gov/protein](http://www.ncbi.nlm.nih.gov/protein)).

| Accession I.D. | PV       | Name    | Identity<br>with Cro p |      | Similarity<br>with Cro p |      |
|----------------|----------|---------|------------------------|------|--------------------------|------|
|                |          |         | 1                      | 2    | 1                        | 2    |
| XP_019397705.1 | $\beta$  | Cro p 1 | 100%                   | 65%  | 100%                     | 71%  |
| XP_019400389.1 | $\alpha$ | Cro p 2 | 65%                    | 100% | 71%                      | 100% |
| 5AHW83198.1    | $\beta$  | Lat c 1 | 72%                    | 59%  | 79%                      | 69%  |
| CAA66403.1     | $\beta$  | Sal s 1 | 59%                    | 53%  | 71%                      | 65%  |
| P02630.1       | $\alpha$ | Ray     | 49%                    | 49%  | 58%                      | 61%  |
| AFP11872.1     | $\alpha$ | Shark   | 56%                    | 69%  | 64%                      | 80%  |
| BAF98924.1     | $\beta$  | Pan h 1 | 71%                    | 60%  | 77%                      | 66%  |
| P02622         | $\beta$  | Gad c 1 | 58%                    | 50%  | 67%                      | 61%  |
| Q8UUS2         | $\beta$  | Cyp c 1 | 71%                    | 61%  | 79%                      | 67%  |

**Table S4** Sequence identity of investigated parvalbumin (PV) isoforms in the IgE-binding regions reported for seabass and salmon PV, Lat c 1 and Sal s 1, respectively. The highest identity for each PV is highlighted in bold.

| PV      | IgE-binding region                                 | Amino acid sequence identity (%) with corresponding peptide from PV |                     |                    |                    |                   |                 |                    |
|---------|----------------------------------------------------|---------------------------------------------------------------------|---------------------|--------------------|--------------------|-------------------|-----------------|--------------------|
|         |                                                    | $\beta$<br>Cro p 1                                                  | $\alpha$<br>Cro p 2 | $\beta$<br>Lat c 1 | $\beta$<br>Sal s 1 | $\alpha$<br>Shark | $\alpha$<br>Ray | $\beta$<br>Pan h 1 |
| Lat c 1 | 1 <b>MAFAGILNEADITAALAACQAADSFKHKDFFVKVGLAGKSD</b> | 59                                                                  | 49                  | 100                | 54                 | 49                | 27              | 71                 |
|         | 2 <b>GDSGDGKIGVDEFAALVKV</b>                       | <b>85</b>                                                           | <b>75</b>           | 100                | <b>75</b>          | <b>70</b>         | <b>70</b>       | <b>85</b>          |
| Sal s 1 | 1 <b>MACAHLCKEADIKTALEA</b>                        | 39                                                                  | 44                  | 56                 | 100                | 39                | 39              | 50                 |
|         | 2 <b>KTFHTIGFASKSADDVK</b>                         | 61                                                                  | 56                  | 61                 | 100                | 56                | 28              | 61                 |
|         | 3 <b>VEELKLFLQNFCKARELTDA</b>                      | 62                                                                  | 48                  | 71                 | 100                | 38                | 57              | 67                 |

**Table S5** Epitopes predicted for Cro p 1 and their comparison with corresponding peptides from three  $\beta$ - (Lat c 1, Sal s 1, Pan h 1) and three  $\alpha$ -parvalbumin isoforms (Cro p 2, ray, shark).

| Predicted Cro p 1 epitope using BcePred | Length     | Position | Number of identical amino acids/length of peptide |         |         |      |       |         |         | Similarity (%) |         |     |       |         |         | Identity (%) |         |     |       |         |     |
|-----------------------------------------|------------|----------|---------------------------------------------------|---------|---------|------|-------|---------|---------|----------------|---------|-----|-------|---------|---------|--------------|---------|-----|-------|---------|-----|
|                                         |            |          | Cro p 2                                           | Lat c 1 | Sal s 1 | Ray  | Shark | Pan h 1 | Cro p 2 | Lat c 1        | Sal s 1 | Ray | Shark | Pan h 1 | Cro p 2 | Lat c 1      | Sal s 1 | Ray | Shark | Pan h 1 |     |
| 1                                       | KGKSADQVKK | 10       | 37-46                                             | 7/10    | 7/10    | 7/10 | 2/10  | 4/10    | 8/10    | 80             | 80      | 80  | 40    | 50      | 90      | 70           | 70      | 70  | 20    | 40      | 80  |
| 2                                       | LDQDKSGF   | 8        | 51-58                                             | 6/8     | 7/8     | 6/8  | 5/8   | 7/8     | 7/8     | 88             | 100     | 88  | 75    | 88      | 100     | 75           | 88      | 75  | 63    | 88      | 88  |
| 3                                       | IEEDELQL   | 8        | 59-65                                             | 6/8     | 7/8     | 5/8  | 4/8   | 6/8     | 7/8     | 75             | 88      | 75  | 63    | 75      | 88      | 75           | 88      | 63  | 50    | 75      | 88  |
| 4                                       | TDAETKA    | 7        | 79-85                                             | 4/7     | 6/7     | 7/7  | 3/7   | 3/7     | 5/7     | 71             | 86      | 100 | 43    | 71      | 86      | 57           | 86      | 100 | 43    | 43      | 71  |
| 5                                       | DTDGDGK    | 7        | 91-97                                             | 6/7     | 6/7     | 5/7  | 5/7   | 6/7     | 7/7     | 86             | 100     | 71  | 86    | 86      | 100     | 86           | 86      | 71  | 71    | 86      | 100 |

| Predicted Cro p 1 epitope using Bepipred | Length       | Position | Number of identical amino acids/length of peptide |         |         |      |       |         |         | Similarity (%) |         |     |       |         |         | Identity (%) |         |     |       |         |     |
|------------------------------------------|--------------|----------|---------------------------------------------------|---------|---------|------|-------|---------|---------|----------------|---------|-----|-------|---------|---------|--------------|---------|-----|-------|---------|-----|
|                                          |              |          | Cro p 2                                           | Lat c 1 | Sal s 1 | Ray  | Shark | Pan h 1 | Cro p 2 | Lat c 1        | Sal s 1 | Ray | Shark | Pan h 1 | Cro p 2 | Lat c 1      | Sal s 1 | Ray | Shark | Pan h 1 |     |
| 1                                        | LKGKSADQ     | 8        | 36-43                                             | 5/8     | 5/8     | 4/8  | 3/8   | 4/8     | 6/8     | 75             | 75      | 63  | 50    | 63      | 88      | 63           | 63      | 50  | 38    | 50      | 75  |
| 2                                        | KSGFI        | 5        | 55-59                                             | 4/5     | 5/5     | 4/5  | 3/5   | 5/5     | 5/5     | 100            | 100     | 80  | 80    | 100     | 100     | 80           | 100     | 80  | 60    | 100     | 100 |
| 3                                        | RALTD        | 6        | 76-81                                             | 3/6     | 6/6     | 5/6  | 3/6   | 2/6     | 5/6     | 67             | 100     | 83  | 67    | 67      | 83      | 50           | 100     | 83  | 50    | 33      | 83  |
| 4                                        | AGDTDGDGKIGV | 12       | 89-100                                            | 11/12   | 11/12   | 9/12 | 10/12 | 11/12   | 12/12   | 92             | 100     | 93  | 92    | 92      | 100     | 92           | 92      | 75  | 83    | 92      | 100 |

| Predicted Cro p 1 epitope using Bepipred-2.0 | Length      | Position | Number of identical amino acids/length of peptide |         |         |      |       |         |         | Similarity (%) |         |     |       |         |         | Identity (%) |         |     |       |         |     |
|----------------------------------------------|-------------|----------|---------------------------------------------------|---------|---------|------|-------|---------|---------|----------------|---------|-----|-------|---------|---------|--------------|---------|-----|-------|---------|-----|
|                                              |             |          | Cro p 2                                           | Lat c 1 | Sal s 1 | Ray  | Shark | Pan h 1 | Cro p 2 | Lat c 1        | Sal s 1 | Ray | Shark | Pan h 1 | Cro p 2 | Lat c 1      | Sal s 1 | Ray | Shark | Pan h 1 |     |
| 1                                            | DILSAK      | 6        | 5-10                                              | 4/6     | 3/6     | 3/6  | 3/6   | 4/6     | 3/6     | 83             | 50      | 67  | 33    | 67      | 67      | 67           | 50      | 50  | 50    | 67      | 50  |
| 2                                            | QAAESFN     | 7        | 20-26                                             | 6/7     | 5/7     | 3/7  | 4/7   | 3/7     | 3/7     | 86             | 86      | 71  | 43    | 86      | 57      | 86           | 71      | 43  | 57    | 43      | 43  |
| 3                                            | GLKGKSADQ   | 9        | 35-44                                             | 6/9     | 6/9     | 5/9  | 4/9   | 5/9     | 7/9     | 80             | 80      | 70  | 60    | 70      | 89      | 67           | 67      | 56  | 44    | 56      | 78  |
| 4                                            | DQDKSGFIED  | 11       | 52-62                                             | 9/11    | 11/11   | 8/11 | 6/11  | 10/11   | 11/11   | 91             | 100     | 82  | 73    | 91      | 100     | 82           | 100     | 73  | 55    | 91      | 100 |
| 5                                            | NFSSSARALTD | 11       | 70-80                                             | 5/11    | 5/11    | 5/11 | 5/11  | 5/11    | 5/11    | 64             | 91      | 64  | 64    | 55      | 82      | 45           | 45      | 45  | 45    | 45      | 45  |
| 6                                            | TGDGKIGVD   | 10       | 92-101                                            | 9/10    | 9/10    | 7/10 | 8/10  | 8/10    | 10/10   | 90             | 100     | 80  | 90    | 80      | 100     | 90           | 90      | 70  | 80    | 80      | 100 |

Note: Both similarity and identity refer to Cro p 1. Peptides with only one mismatch or two mismatches but a higher similarity than identity are shaded, suggesting cross-binding by IgE antibodies. Peptides which can explain the observed cross-binding to  $\beta$ - but not  $\alpha$ -parvalbumin isoforms are in bold.
